# Supplementary material for: Anticancer Effects of Abietane Diterpene 7α-Acetoxy-6β-hydroxyroyleanone from Plectranthus grandidentatus and Its Semi-Synthetic Analogs: An In Silico Computational Approach
Source: MDPI journal article supplement (doi:10.3390/molecules29081807), 2024-04-16
Supplement: s1 [file s1]

## Supplementary materials

Table S1. Key physicochemical parameters of the examined compounds obtained using the SwissADME server.

| Compound | Formula                                        | MW     | No. heavy atoms | No. aromatic heavy atoms | Fraction Csp <sup>3</sup> | No. rotatable bonds | No. H-bond acceptors | No. H-bond donors | Molar refractivity |
|----------|------------------------------------------------|--------|-----------------|--------------------------|---------------------------|---------------------|----------------------|-------------------|--------------------|
| 1        | C <sub>22</sub> H <sub>30</sub> O <sub>6</sub> | 390.47 | 28              | 0                        | 0.68                      | 3                   | 6                    | 2                 | 104.48             |
| 2        | C <sub>30</sub> H <sub>36</sub> O <sub>7</sub> | 508.60 | 37              | 6                        | 0.53                      | 7                   | 7                    | 1                 | 138.29             |
| 3        | C <sub>30</sub> H <sub>36</sub> O <sub>7</sub> | 508.60 | 37              | 6                        | 0.53                      | 6                   | 7                    | 1                 | 138.67             |
| 4        | C <sub>27</sub> H <sub>38</sub> O <sub>2</sub> | 490.59 | 35              | 0                        | 0.70                      | 7                   | 8                    | 1                 | 129.74             |
| 5        | C <sub>26</sub> H <sub>36</sub> O <sub>7</sub> | 460.56 | 33              | 0                        | 0.69                      | 7                   | 7                    | 1                 | 123.42             |
| 6        | C <sub>36</sub> H <sub>38</sub> O <sub>8</sub> | 598.68 | 44              | 12                       | 0.42                      | 9                   | 8                    | 0                 | 163.34             |

Table S2. Predicted lipophilicity of the examined compounds obtained using the SwissADME server.

| Compound | TPSA   | iLOGP | XLOGP | WLOGP | MLOGP | Silicos-IT GP | Consensus LogP |
|----------|--------|-------|-------|-------|-------|---------------|----------------|
| 1        | 100.90 | 3.11  | 3.36  | 3.04  | 1.43  | 3.22          | 2.83           |
| 2        | 106.97 | 4.03  | 5.06  | 4.27  | 2.75  | 5.26          | 4.27           |
| 3        | 106.97 | 4.48  | 5.49  | 4.65  | 3.02  | 5.39          | 4.61           |
| 4        | 116.20 | 4.15  | 4.86  | 4.44  | 2.02  | 4.22          | 3.94           |
| 5        | 106.97 | 3.76  | 4.30  | 3.83  | 2.20  | 4.57          | 3.73           |
| 6        | 113.04 | 5.17  | 7.36  | 6.21  | 4.13  | 6.44          | 5.86           |

Table S3. Predicted water solubility of the examined compounds obtained using the SwissADME server.

| Compound | ESOL log S | ESOL solubility [mg/mL] | ESOL solubility [mol/L] | ESOL class         | Ali log S | Ali solubility [mg/mL] | Ali solubility [mol/L] | Ali class          | Silico s-IT log S | Silicos-IT solubility [mg/mL] | Silicos-IT solubility [mol/L] | Silicos-IT class |
|----------|------------|-------------------------|-------------------------|--------------------|-----------|------------------------|------------------------|--------------------|-------------------|-------------------------------|-------------------------------|------------------|
| 1        | -4.18      | 2.58e-02                | 6.61e-05                | Moderately soluble | -5.16     | 2.72e-03               | 6.97e-06               | Moderately soluble | -3.61             | 9.58e-02                      | 2.45e-04                      | Soluble          |

|   |       |          |          |                           |       |          |          |                   |       |          |          |                           |
|---|-------|----------|----------|---------------------------|-------|----------|----------|-------------------|-------|----------|----------|---------------------------|
| 2 | -5.84 | 7.37e-04 | 1.45e-06 | Modera<br>tely<br>soluble | -7.05 | 4.55e-05 | 8.95e-08 | Poorly<br>soluble | -6.68 | 1.07e-04 | 2.10e-07 | Poorly<br>soluble         |
| 3 | -6.18 | 3.39e-04 | 6.67e-07 | Poorly<br>soluble         | -7.49 | 1.63e-05 | 3.20e-08 | Poorly<br>soluble | -6.66 | 1.11e-04 | 2.19e-07 | Poorly<br>soluble         |
| 4 | -5.48 | 1.62e-03 | 3.30e-06 | Modera<br>tely<br>soluble | -7.03 | 4.53e-05 | 9.23e-08 | Poorly<br>soluble | -4.73 | 9.18e-03 | 1.87e-05 | Modera<br>tely<br>soluble |
| 5 | -4.94 | 5.26e-03 | 1.14e-05 | Modera<br>tely<br>soluble | -6.26 | 2.53e-04 | 5.50e-07 | Poorly<br>soluble | -5.01 | 4.54e-03 | 9.86e-06 | Modera<br>tely<br>soluble |
| 6 | -7.80 | 9.57e-06 | 1.60e-08 | Poorly<br>soluble         | -9.56 | 1.64e-07 | 2.74e-10 | Poorly<br>soluble | -8.94 | 6.84e-07 | 1.14e-09 | Poorly<br>soluble         |

Table S4. Predicted pharmacokinetics parameters of the examined compounds obtained by using the SwissADME server.

| <b>Compound</b> | GI<br>adsorption | BBB<br>permeant | Pgp<br>substrate | CYP1A2<br>inhibitor | CYP2C19<br>inhibitor | CYP2C9<br>inhibitor | CYP2D6<br>inhibitor | CYP3A4<br>inhibitor | Log<br>Kp<br>[cm/s] |
|-----------------|------------------|-----------------|------------------|---------------------|----------------------|---------------------|---------------------|---------------------|---------------------|
| 1               | High             | No              | Yes              | No                  | No                   | No                  | No                  | Yes                 | -6.30               |
| 2               | High             | No              | Yes              | No                  | No                   | Yes                 | No                  | Yes                 | -5.81               |
| 3               | High             | No              | Yes              | No                  | No                   | Yes                 | No                  | Yes                 | -5.50               |
| 4               | High             | No              | Yes              | No                  | No                   | Yes                 | No                  | No                  | -5.84               |
| 5               | High             | No              | Yes              | No                  | No                   | Yes                 | No                  | No                  | -6.06               |
| 6               | Low              | No              | Yes              | No                  | No                   | Yes                 | No                  | Yes                 | -4.73               |

Table S5. Predicted drug-likeness, medicinal chemistry, and lead-likeness pharmacokinetic parameters of the examined compounds obtained by using the SwissADME server.

| <b>Compound</b> | Lipinski #<br>violations | Ghose #<br>violations | Veber #<br>violations | Egan #<br>violations | Muegge #<br>violations | Bioavai<br>lability<br>score | PAINS #<br>alerts | Brenks #<br>alerts | Leadlikeness #<br>violations | Synthetic<br>accessibil<br>ity |
|-----------------|--------------------------|-----------------------|-----------------------|----------------------|------------------------|------------------------------|-------------------|--------------------|------------------------------|--------------------------------|
| 1               | 0                        | 0                     | 0                     | 0                    | 0                      | 0.56                         | 1                 | 1                  | 1                            | 5.23                           |
| 2               | 1                        | 3                     | 0                     | 0                    | 1                      | 0.56                         | 1                 | 2                  | 2                            | 5.92                           |
| 3               | 1                        | 3                     | 0                     | 0                    | 1                      | 0.56                         | 1                 | 2                  | 2                            | 5.82                           |
| 4               | 0                        | 2                     | 0                     | 0                    | 0                      | 0.56                         | 1                 | 2                  | 2                            | 5.99                           |
| 5               | 0                        | 0                     | 0                     | 0                    | 0                      | 0.56                         | 1                 | 2                  | 2                            | 5.89                           |
| 6               | 1                        | 4                     | 0                     | 1                    | 1                      | 0.56                         | 1                 | 2                  | 3                            | 6.19                           |

Table S6. Predicted organ toxicity and toxicological endpoints activity of the examined compounds obtained using the ProTox-II server. (% probability)

| Compound | Hepatotoxicity<br>(% probability) | Carcinogenicity<br>(% probability) | Immunotoxicity<br>(% probability) | Mutagenicity<br>(% probability) | Cytotoxicity<br>(% probability) |
|----------|-----------------------------------|------------------------------------|-----------------------------------|---------------------------------|---------------------------------|
| 1        | Inactive (72)                     | Active (50)                        | Active (94)                       | Inactive (85)                   | Inactive (81)                   |
| 2        | Inactive (76)                     | Active (51)                        | Active (87)                       | Inactive (85)                   | Inactive (72)                   |
| 3        | Inactive (70)                     | Active (50)                        | Active (88)                       | Inactive (84)                   | Inactive (83)                   |
| 4        | Inactive (62)                     | Active (52)                        | Active (98)                       | Inactive (77)                   | Inactive (85)                   |
| 5        | Inactive (77)                     | Active (53)                        | Active (94)                       | Inactive (87)                   | Inactive (71)                   |
| 6        | Inactive (57)                     | Active (51)                        | Active (96)                       | Inactive (78)                   | Inactive (85)                   |

Table S7. Toxicological pathways: nuclear receptor signaling pathways predicted for the examined compounds obtained using the ProTox-II server. (% probability)

| Compound | Aryl<br>Hydrocarbon<br>Receptor<br>(AhR) | Androgen<br>Receptor<br>(AR) | Androgen<br>Receptor<br>Ligand<br>Binding<br>Domain (AR-<br>LBD) | Aromatase<br>Membrane<br>Potential (MMP) | Estrogen<br>Receptor<br>Alpha<br>(ER) | Estrogen<br>Receptor<br>Ligand<br>Binding<br>Domain<br>(ER-LBD) | Peroxisome<br>Proliferator<br>Activated<br>Receptor<br>Gamma (PPAR-<br>Gamma) |
|----------|------------------------------------------|------------------------------|------------------------------------------------------------------|------------------------------------------|---------------------------------------|-----------------------------------------------------------------|-------------------------------------------------------------------------------|
| 1        | Inactive (91)                            | Inactive<br>(86)             | Inactive (87)                                                    | Inactive<br>(87)                         | Inactive<br>(77)                      | Inactive (87)                                                   | Inactive (96)                                                                 |
| 2        | Inactive (94)                            | Inactive<br>(75)             | Inactive (7)                                                     | Inactive<br>(83)                         | Inactive<br>(68)                      | Inactive (85)                                                   | Inactive (96)                                                                 |
| 3        | Inactive (89)                            | Inactive<br>(86)             | Inactive (85)                                                    | Inactive<br>(83)                         | Inactive<br>(75)                      | Inactive (83)                                                   | Inactive (94)                                                                 |
| 4        |                                          |                              |                                                                  |                                          |                                       |                                                                 |                                                                               |
| 5        | Inactive (97)                            | Inactive<br>(74)             | Inactive (80)                                                    | Inactive<br>(82)                         | Inactive<br>(73)                      | Inactive (89)                                                   | Inactive (97)                                                                 |
| 6        | Inactive (86)                            | Inactive<br>(86)             | Inactive (82)                                                    | Inactive<br>(82)                         | Inactive<br>(72)                      | Inactive (78)                                                   | Inactive (95)                                                                 |

Table S8. Toxicological pathways: stress response pathways predicted for the compounds examined obtained using the ProTox-II server. (% probability)

| Compound | Nuclear Factor<br>(Erythroid-Derived 2-<br>Like 2/Antioxidant<br>Responsive Element)<br>(nrf2/ARE) | Heat Shock<br>Factor<br>Response<br>Element<br>(HSE) | Mitochondrial<br>Membrane<br>Potential (MMP) | Phosphoprotein<br>(Tumor Suppressor)<br>p53 | ATPase Family<br>AAA Domain<br>Containing<br>Protein 5<br>(ATAD5) |
|----------|----------------------------------------------------------------------------------------------------|------------------------------------------------------|----------------------------------------------|---------------------------------------------|-------------------------------------------------------------------|
|----------|----------------------------------------------------------------------------------------------------|------------------------------------------------------|----------------------------------------------|---------------------------------------------|-------------------------------------------------------------------|

|   |               |               |               |               |               |
|---|---------------|---------------|---------------|---------------|---------------|
| 1 | Inactive (76) | Inactive (76) | Inactive (58) | Inactive (93) | Inactive (84) |
| 2 | Inactive (84) | Inactive (84) | Inactive (56) | Inactive (90) | Inactive (90) |
| 3 | Inactive (84) | Inactive (84) | Inactive (52) | Inactive (89) | Inactive (85) |
| 4 | Inactive (74) | Inactive (74) | Active (52)   | Inactive (84) | Inactive (86) |
| 5 | Inactive (76) | Inactive (76) | Active (50)   | Inactive (95) | Inactive (93) |
| 6 | Inactive (74) | Inactive (74) | Active (53)   | Inactive (86) | Inactive (85) |

Table S9. Predicted acute toxicity of the examined compounds obtained using the StopTox server.

| Compound | Inhalation Toxicity | Oral Toxicity | Dermal Toxicity | Eye Irritation and Corrosion | Skin Sensitization | Skin Irritation and Corrosion |
|----------|---------------------|---------------|-----------------|------------------------------|--------------------|-------------------------------|
| 1        | No                  | No            | No              | No                           | No                 | No                            |
| 2        | No                  | No            | No              | No                           | No                 | No                            |
| 3        | No                  | No            | No              | No                           | No                 | No                            |
| 4        | No                  | No            | No              | No                           | No                 | No                            |
| 5        | No                  | No            | No              | No                           | No                 | No                            |
| 6        | No                  | No            | No              | No                           | Yes                | No                            |

Table S10. Predicted toxicity risks for the examined compounds obtained using the OSIRIS server.

| Compound | Mutagenic Potential | Tumorigenic Potential | Irritant Potential | Reproductive Effectivity |
|----------|---------------------|-----------------------|--------------------|--------------------------|
| 1        | Medium              | Low                   | High               | Low                      |
| 2        | Medium              | Low                   | High               | Low                      |
| 3        | Medium              | Low                   | High               | Low                      |
| 4        | Medium              | Low                   | High               | Low                      |
| 5        | Medium              | Low                   | High               | Low                      |
| 6        | Medium              | Low                   | High               | Low                      |

Table S11. The molecular docking results of compounds **1-6** against target proteins.

| Compound     | Binding energy (kcal/mol) | Hydrogen bonds | Other bonds                                                                                                                                        |
|--------------|---------------------------|----------------|----------------------------------------------------------------------------------------------------------------------------------------------------|
| <b>BCL-2</b> |                           |                |                                                                                                                                                    |
| <b>1</b>     | -9.50                     | ASP B: 70      | GLU B: 111, PHE B: 112, GLY B: 104, ALA B: 108, ARG B: 105, LEU B: 96, PHE B: 63, TYR B: 67, MET B: 74, PHE B: 71                                  |
| <b>2</b>     | -10.46                    | LEU B: 160     | VAL B: 107, PHE B: 63, GLY B: 104, GLU B: 58, PRO B: 163, GLY B: 162, TYR B: 161, SER A: 76, ARG A: 69, ALA A: 72, GLY B: 60, ALA B: 59, ASP B: 62 |

|                  |        |                        |                                                                                                                                                                                                                                                                        |
|------------------|--------|------------------------|------------------------------------------------------------------------------------------------------------------------------------------------------------------------------------------------------------------------------------------------------------------------|
| 3                | -10.22 | LEU B: 160             | PHE B: 63, TYR B: 67, ARG B: 66, ASP B: 62, GLU B: 58, PRO B: 163, TYR B: 161, GLY B: 162, SER A: 76, ARG A: 69, ALA A: 72, ALA B: 59, GLY B: 60, VAL B: 107                                                                                                           |
| 4                | -10.28 | TYR B: 161             | ASN B:102, ARG A: 68, ARG A: 105, PHE B: 63, VAL B: 107, ARG B: 66, ALA B: 59, ASP B: 62, PRO B: 163, GLU B: 58, SER A: 76, ALA A: 72, GLYB: 104, LEU B: 160, TYR B: 67                                                                                                |
| 5                | -8.71  | ASP B: 62              | GLY B: 60, VAL B: 107, GLY B: 104, PHE B: 63, ARG B: 66, SER A: 76, LEU B: 160, PRO B: 163, TYR B: 161, GLU B: 58, ALA B: 59                                                                                                                                           |
| 6                | -10.36 | TYR B: 161             | ALA A: 72, GLU B: 58, ALA B: 59, ASP B: 62, VAL B: 107, PHE B: 63, ARG B: 66, TYR B: 67, GLY B: 104, ARG B: 105, TRP B: 103, PRO B: 163, SER A: 76, SER A: 75                                                                                                          |
| <b>BCL-XL</b>    |        |                        |                                                                                                                                                                                                                                                                        |
| 1                | -10.42 | -                      | PHE A: 105, TYR A: 101, ARG A: 100, ASP B: 133, ARG A: 103, ARG B: 132, GLU B: 129, ALA A: 104, PHE B: 131, LEU B: 130, PHE B: 105, ALA B: 141, ASN B: 136, GLY B: 138, PHE B: 97                                                                                      |
| 2                | -10.95 | -                      | PHE B: 97, GLY B: 138, PHE B: 105, LEU B: 108, ASN B: 135, SER B: 106, LEU B: 130, GLU B: 129, ALA A: 104, ARG B: 139, ASP B: 133, TYR A: 101, PHE A: 97; PHE A: 105, TYR B: 101                                                                                       |
| 3                | -12.26 | ARG A: 139, ASN A: 136 | LEU A: 108, GLU A: 129, ALA A: 142, LEU A: 130, ARG A: 102, ARG A: 132, ALA B: 104, TYR B: 101, GLY A: 138, PHE A: 97, PHE A: 105, SER A: 106                                                                                                                          |
| 4                | -12.84 | -                      | ARG B: 102, GLU B: 129, ALA A: 104, ASP B: 133, TYR A: 101, ASN B: 136, GLY B: 138, TYR B: 101, PHE B: 105, PHE B: 97, ALA B: 142, SER B: 106, LEU B: 108, LEU B: 130, ASP B: 107, PHE B: 146                                                                          |
| 5                | -9.94  | -                      | ASP A: 133, PHE B: 97, TYR B: 101, PHE B: 105, ASN A: 136, TYR A: 101, GLY A: 138, PHE A: 105, PHE A: 97, LEU A: 130, ALA A: 142, ARG A: 139, ALA B: 104, ARG B: 100                                                                                                   |
| 6                | -11.25 | -                      | GLU A: 96, ALA A: 93, TYR A: 195, VAL A: 141, PHE A: 191, GLY A: 138, PHE A: 97, TYR A: 101, ARG A: 139, ALA A: 142, ARG B: 139, ALA A: 104, PHE B: 105, PHE A: 105, ASN A: 136                                                                                        |
| <b>Caspase 3</b> |        |                        |                                                                                                                                                                                                                                                                        |
| 1                | -9.09  | TYR A: 197, PRO B: 201 | LYS A: 137, GLY B: 202, TYR B: 203, ALA B: 200, TYR A: 195, VAL A: 266, MET A: 268, GLY A: 125, THR A: 140, ARG A: 164, LEU A: 136, GLU A: 124, ASP A: 135                                                                                                             |
| 2                | -9.63  | ARG A: 164, TYR A: 197 | TYR B: 197, TYR B: 195, VAL B: 266, ARG B: 164, CYS B: 264, VAL A: 266, CYS A: 264, PRO B: 201, TYR A: 195, THR A: 140, LEU A: 136, GLY A: 125, LYS A: 137, GLU A: 124, GLU A: 124, GLU B: 124, MET B: 268, PRO A: 201                                                 |
| 3                | -9.58  | TYR A: 197             | THR B: 140, LYS B: 137, TYR B: 197, LEU B: 136, PRO A: 201, ARG B: 164, CYS B: 264, VAL A: 266, GLU A: 124, VAL B: 266, ARG A: 164, CYS A: 264, GLY A: 125, LEU A: 136, TYR A: 195, THR A: 140, GLY B: 202, LYS A: 137, GLU B: 124, PRO B: 201, GLY B: 125             |
| 4                | -11.86 | ARG A:164, TYR B:197   | THR A:140, GLY A: 125, GLU A: 124, GLU B: 124, LEU B: 136, LYS B: 137, ASP B: 135, GLY B: 125, TYR B: 195, THR B: 140, PRO A: 201, MET B: 268, ARG B: 164, CYS A: 264, VAL B: 266, CYS B: 264, VAL A: 266, PRO B: 201, TYR A: 195, TYR A: 197, LEU A: 136, LYS A: 137, |
| 5                | -8.39  | ARG A: 164, CYS A: 264 | LEU B: 136, THR B: 140, TYR B: 195, MET B: 268, TYR B: 197, PRO A: 201, VAL B: 266, VAL A: 266, PRO B: 201, ARG B: 164, TYR A: 197, GLU B: 124, LYS B: 137, GLU A: 124, GLY B: 125, ASP B: 135                                                                         |
| 6                | -9.89  | LYS B: 137             | LEU A:136, GLY A: 125, CYS B: 264, TYR A: 197, PRO B: 201, VAL A: 266, ARG B: 164, ARG B: 164, VAL B: 266, ARG A: 164, CYS A: 264,                                                                                                                                     |

|                                                                                                |        |                        |                                                                                                                                                                                                                                                        |
|------------------------------------------------------------------------------------------------|--------|------------------------|--------------------------------------------------------------------------------------------------------------------------------------------------------------------------------------------------------------------------------------------------------|
| GLU A: 124, GLU B: 124, TYR B: 195, PRO A: 201, LEU B: 136, GLY A: 202, GLU A: 167, GLY B: 125 |        |                        |                                                                                                                                                                                                                                                        |
| <b>Caspase 9</b>                                                                               |        |                        |                                                                                                                                                                                                                                                        |
| 1                                                                                              | -10.60 | THRB: 181, PROB: 349   | THRB: 179, ARGB: 178, HISB: 237, CYSB: 287, ARGB: 180, PHEB: 351, SERB: 361, PHEB: 348, GLYB: 350, GLYB: 360, GLYB: 182, ASPB: 186, SERB: 183, PROB: 357                                                                                               |
| 2                                                                                              | -8.43  | GLY B: 350             | LYS B: 394, PHE B: 348, PRO B: 349, TRP B: 354, ARG B: 355, PHE B: 351, PRO B: 357, ARG B: 178, THR B: 181, THR B: 179, ARG B: 180, CYS B: 287, HIS B: 237                                                                                             |
| 3                                                                                              | -9.35  | GLY B: 350, LYS B: 394 | GLY B: 395, ILE B: 396, TYR B: 397, PHE B: 348, LYS B: 398, PRO B: 349, GLY B: 288, CYS B: 287, TRP B: 354, PHE B: 351                                                                                                                                 |
| 4                                                                                              | -10.30 | TYR B: 397             | TRP B: 354, PRO B: 357, PHE B: 351, GLY B: 350, LYS B: 394, TRP B: 362, PHE B: 348, GLY B: 395, ILE B: 396, PRO B: 349, LYS B: 398                                                                                                                     |
| 5                                                                                              | -8.19  | -                      | LYS B: 394, GLY B: 395, ILE B: 396, TYR B: 397, PRO B: 349, PHE B: 348, TRP B: 354, LYS B: 398, GLY B: 350, PHE B: 351                                                                                                                                 |
| 6                                                                                              | -9.63  | -                      | PHE B: 348, ARG B: 355, TRP B: 354, PHE B: 351, PRO B: 357, ARG B: 178, THR B: 179, THR B: 181, ARG B: 180, HIS B: 237, CYS B: 287, GLY B: 288, PRO B: 239, GLY B: 350                                                                                 |
| <b>CDK2</b>                                                                                    |        |                        |                                                                                                                                                                                                                                                        |
| 1                                                                                              | -11.86 | -                      | GLY A: 11, GLN A: 131, GLU A: 12, ASN A: 132, LYS A: 33, ASP A: 145, ALA A: 144, VAL A: 18, PHE A: 80, ALA A: 31, VAL A: 64, LEU A: 134, GLU A: 81, ILE A: 10, LEU A: 83, PHE A: 82, HIS A: 84, GLN A: 85, ASP A: 86                                   |
| 2                                                                                              | -12.18 | GLN A: 131             | LYS A: 129, ASN A: 132, GLY A: 13, GLU A: 12, GLY A: 11, VAL A: 18, LYS A: 33, ALA A: 144, ASP A: 145, PHE A: 80, ALA A: 31, VAL A: 64, PHE A: 82, GLU A: 81, ILE A: 10, LEU A: 83, GLN A: 85, LEU A: 134, ASP A: 86                                   |
| 3                                                                                              | -12.56 | -                      | VAL A: 64, PHE A: 80, ALA A: 144, LYS A: 33, ASP A: 145, LEU A: 83, ALA A: 31, PHE A: 82, LEU A: 134, ILE A: 10, GLY A: 11, GLN A: 85, ASP A: 86, ASN A: 132, LYS A: 129, GLN A: 131, GLY A: 13, GLU A: 12, GLU A: 81, VAL A: 18                       |
| 4                                                                                              | -13.49 | -                      | LYS A: 20, VAL A: 18, GLY A: 11, GLN A: 131, GLU A: 12, GLY A: 13, ASP A: 145, ASN A: 132, LYS A: 33, ALA A: 144, VAL A: 64, PHE A: 80, ALA A: 31, LEU A: 134, LEU A: 83, ILE A: 10, PHE A: 82, LYS A: 89, GLN A: 85, ASP A: 86, LEU A: 298, HIS A: 84 |
| 5                                                                                              | -11.49 | ASP A: 145, LYS A: 33  | HIS A: 84, ASP A: 86, ILE A: 10, GLY A: 11, VAL A: 18, GLU A: 12, GLY A: 13, GLY A: 16, THR A: 14, ASN A: 132, ALA A: 144, VAL A: 64, GLN A: 131, LEU A: 134, ALA A: 31, GLN A: 85, LEU A: 83, PHE A: 82                                               |
| 6                                                                                              | -11.57 | -                      | VAL A: 18, ILE A: 10, LEU A: 83, PHE A: 80, ALA A: 31, VAL A: 64, GLU A: 81, LEU A: 134, PHE A: 82, HIS A: 84, GLN A: 85, LYS A: 89, LYS A: 88, GLN A: 131, GLY A: 11, GLY A: 13, GLU A: 12                                                            |
| <b>CDK6</b>                                                                                    |        |                        |                                                                                                                                                                                                                                                        |
| 1                                                                                              | -11.36 | VAL A: 150             | LEU A: 32, PRO A: 35, LEU A: 34, ARG A: 30, ARG A: 82, ALA A: 149, ALA A: 152, LEU A: 151, SER A: 78, ILE A: 198, ALA A: 191, LEU A: 193, PRO A: 195, LEU A: 192, SER A: 194                                                                           |
| 2                                                                                              | -13.27 | ALAA: 152, VALA: 150   | ASP A: 81, ARG A: 52, SER A: 78, VAL A: 77, LEU A: 151, PRO A: 74, LEU A: 185, ALA A: 149, PRO A: 195, ILE A: 198, GLU A: 31, LEU A: 34, ALA A: 191, LYS A: 36, THR A: 38, LEU A: 192, LEU A: 440                                                      |
| 3                                                                                              | -13.83 | ALAA: 152, VALA: 150   | SER A: 39, LEU A: 40, THR A: 38, LEU A: 192, LEU A: 193, PRO A: 74, VAL A: 77, LEU A: 151, LEU A: 185, SER A: 78, ILE A: 198, ALA A: 149, PRA A: 195, LEU A: 34, SER A: 194, GLE A: 31, LYS A: 36                                                      |

|              |        |                                                 |                                                                                                                                                                                                                                                                       |
|--------------|--------|-------------------------------------------------|-----------------------------------------------------------------------------------------------------------------------------------------------------------------------------------------------------------------------------------------------------------------------|
| 4            | -14.28 | ASP A: 81                                       | GLU A: 148, HISB: 67, ALA A: 149, ARG A: 82, LEU A: 151, PRO A: 74, ALA A: 152, PRO A: 195, SER A: 78, LEU A: 193, ILE A: 198, LEU A: 185, ALA A: 191, LEU A: 40, VAL A: 77, ARG A: 52, LYS A: 36, VAL A: 150, GLU A: 31, LEU A: 34, ARG A: 30, LEU A: 33             |
| 5            | -12.14 | LEU A: 193                                      | TRP A: 41, LEU A: 40, ASP A: 81, ARG A: 82, LEU A: 34, SER A: 78, ILE A: 198, VAL A: 77, LEU A: 185, PRO A: 74, ALA A: 152, PRO A: 195, LEU A: 151, VAL A: 150, SER A: 194, GLU A: 31, LEU A: 192, ALA A: 191, THR A: 38, LYS A: 36, PRO A: 35, CYS A: 85             |
| 6            | -15.45 | -                                               | LEU A: 32, PRO A: 35, GLU A: 31, VAL A: 150, ARG A: 30, LEU A: 34, ALA A: 149, ARG A: 82, ASP A: 81, SER A: 78, ILE A: 198, ALA A: 152, LEU A: 151, PRO A: 74, LEU A: 185, VAL A: 77, ARG A: 52, ALA A: 191, LEU A: 40, LEU A: 192, SER A: 194, PRO A: 195, LYS A: 36 |
| <b>EGFR</b>  |        |                                                 |                                                                                                                                                                                                                                                                       |
| 1            | -10.04 | CYS A: 751                                      | ARG A: 817, CYS A: 773, GLY A: 772, LEU A: 694, MET A: 769, VAL A: 702, GLN A: 767, LEU A: 820, ALA A: 719, THR A: 830, MET A: 742, GLU A: 738, LYS A: 721, ASP A: 831                                                                                                |
| 2            | -11.14 | THR A: 766                                      | PHE A: 699, THR A: 830, LYS A: 721, MET A: 742, GLU A: 738, ASP A: 831, VAL A: 702, GLN A: 767, LEU A: 820, ALA A: 719, LEU A: 768, MET A: 769, LEU A: 694, GLY A: 772, CYS A: 773, ASN A: 818, ARG A: 817                                                            |
| 3            | -10.38 | MET A: 769                                      | GLY A: 695, PHE A: 699, VAL A: 702, LEU A: 694, GLY A: 772, ALA A: 719, LYS A: 721, LEU A: 768, THR A: 766, LEU A: 820, MET A: 742, THR A: 830 ARG A: 817, ASP A: 831                                                                                                 |
| 4            | -11.65 | -                                               | ARG A: 817, PRO A: 853, ASP A: 813, LEU A: 834, GLU A: 734, LYS A: 851, GLY A: 833, ASP A: 737, VAL A: 741, LYS A: 836, ALA A: 835, ILE A: 735, GLU A: 738, PHE A: 832, LEU A: 723, ASP A: 831, PHE A: 699, ALA A: 698                                                |
| 5            | -9.94  | MET A: 769                                      | GLY A: 695, VAL A: 702, ASP A: 831, THR A: 830, LEU A: 694, GLU A: 738, PHE A: 832, MET A: 742, LYS A: 721, THR A: 766, ALA A: 719, GLN A: 767, LEU A: 820, MEU A: 768, PRO A: 770, GLY A: 772, CYS A: 773, PHE A: 771                                                |
| 6            | -10.54 |                                                 | ASP A: 831, PHE A: 699, GLY A: 695, VAL A: 702, THR A: 830, GLU A: 738, THR A: 766, MET A: 742, ALA A: 719, LEU A: 694, GLY A: 772, LEU A: 820, ASN A: 818                                                                                                            |
| <b>VEGFR</b> |        |                                                 |                                                                                                                                                                                                                                                                       |
| 1            | -10.25 | ARG A: 1049, ASN A: 921, LEU A: 838, CYS A: 917 | GLY A: 839, VAL A: 846, ALA A: 864, GLU A: 915, PHE A: 916, LYS A: 918, PHE A: 919, GLY A: 920, LEU A: 1033, PHE A: 1045                                                                                                                                              |
| 2            | -11.50 | GLU A: 883, ASP A: 1044                         | LYS A: 866, ILE A: 886, LEU A: 887, ILE A: 890, VAL A: 896, VAL A: 897, LEU A: 1017, CYS A: 1022, ILE A: 1023, HIS A: 1024, ARG A: 1025, ILE A: 1042, CYS A: 1043, PHE A: 1045, GLY A: 1046                                                                           |
| 3            | -11.77 | GLU A: 883, ASP A: 1044                         | HIS A: 814, LYS A: 866, ILE A: 886, LEU A: 887, HIS A: 889, ILE A: 890, VAL A: 896, VAL A: 897, LEU A: 1017, LYS A: 1021, CYS A: 1022, ILE A: 1023, HIS A: 1024, ARG A: 1025, ILE A: 1042, CYS A: 1043, PHE A: 1045, GLY A: 1046                                      |
| 4            | -12.39 | ILE A: 1023                                     | ILE A: 886, VAL A: 897, LEU A: 887, GLU A: 883, VAL A: 914, CYS A: 1043, LEU A: 1033, PHE A: 1045, ILE A: 890, ASP A: 1044, LEU A: 1017, VAL A: 896, ILE A: 1042, HIS A: 1024, CYS A: 1022, ARG A: 1025                                                               |
| 5            | -9.95  | GLU A: 883                                      | PHE A: 843, LYS A: 866, ALA A: 879, LEU A: 880, SER A: 882, ILE A: 886, LEU A: 887, ILE A: 890, VAL A: 896, VAL A: 897, LEU A: 1017, CYS                                                                                                                              |

|               |        |                                                                                                                                                                                                                   |                                                                                                                                                                                                                                                            |
|---------------|--------|-------------------------------------------------------------------------------------------------------------------------------------------------------------------------------------------------------------------|------------------------------------------------------------------------------------------------------------------------------------------------------------------------------------------------------------------------------------------------------------|
|               |        |                                                                                                                                                                                                                   | A: 1022, ILE A: 1023, HIS A: 1024, ARG A: 1025, ILE A: 1042, CYS A: 1043, ASP A: 1044                                                                                                                                                                      |
| 6             | -11.03 | ASP A: 1050, ALA A: 842, PHE A: 843, ASP A: 1026, ARG A: 1030, ASP A: 1044, PHE ARG A: 1049, A: 1045, ALA A: 1048, ILE A: 1051, ALA A: 1063, ARG A: 1064, PRO A: LEU A: 1047, 1066<br>GLY A: 1046,<br>ASN A: 1031 |                                                                                                                                                                                                                                                            |
| <b>P53</b>    |        |                                                                                                                                                                                                                   |                                                                                                                                                                                                                                                            |
| 1             | -9.86  | GLN A: 23                                                                                                                                                                                                         | ARG A: 10, PHE A: 16, ASN A: 17, LYS A: 20, ILE A: 21, ILE A: 22, GLY A: 24, GLU A: 89, TYR A: 92, LEU A: 100, LEU A: 103, ARG A: 104, CYS A: 114, PRO A: 115                                                                                              |
| 2             | -11.32 | -                                                                                                                                                                                                                 | ARG A: 10, HIS A: 11, PHE A: 16, ASN A: 17, LYS A: 20, ILE A: 21, ILE A: 22, GLN A: 23, GLY A: 24, ARG A: 61, GLU A: 89, TYR A: 92, LEU A: 100, LEU A: 103, ARG A: 104, CYS A: 114, PRO A: 115, HIS A: 198, GLY A: 199, ALA A: 200, ARG A: 203, VAL A: 229 |
| 3             | -11.06 | ARG A: 203, ASN A: 17                                                                                                                                                                                             | ARG A: 10, PHE A: 16, LYS A: 20, ILE A: 21, ILE A: 22, GLN A: 23, GLU A: 89, TYR A: 92, LEU A: 100, GLY A: 199, ALA A: 200, VAL A: 229, THR A: 230, PRO A: 231, ASN A: 232, GLN A: 260                                                                     |
| 4             | -11.40 | LEU A:100, THR A: 230                                                                                                                                                                                             | GLU A: 89, TYR A: 92, ARG A: 104, VAL A: 229, ARG A: 203, GLY A: 199, PRO A: 231, ASN A: 232, LYS A: 20, ARG A: 10, ASN A: 17, ILE A: 21, PHE A: 16, ILE A: 22, ARG A: 61, GLN A: 23                                                                       |
| 5             | -9.95  | ARG A:203, ILE A:21, ASN A:17                                                                                                                                                                                     | ARG A: 10, PHE A: 16, LYS A: 20, ILE A: 22, GLN A: 23, GLU A: 89, TYR A: 92, LEU A: 100, GLY A: 199, ALA A: 200, VAL A: 229, THR A: 230, PRO A: 231, ASN A: 232                                                                                            |
| 6             | -10.33 | ARG A: 10                                                                                                                                                                                                         | PHE A: 16, ASN A: 17, LYS A: 18, LYS A: 20, ILE A: 21, ILE A: 22, GLN A: 23, GLU A: 89, TYR A: 92, LEU A: 100, ARG A: 203, SER A: 228, VAL A: 229, THR A: 230, PRO A: 231, ASN A: 232                                                                      |
| <b>PARP-1</b> |        |                                                                                                                                                                                                                   |                                                                                                                                                                                                                                                            |
| 1             | -11.15 | GLY A: 863                                                                                                                                                                                                        | GLY A: 888, TYR A: 889, HIS A: 862, SER A: 904, ALA A: 898, LYS A: 903, PHE A: 897, TYR A: 896, GLU A: 988, MET A: 980                                                                                                                                     |
| 2             | -11.15 | ARG A: 878, ALA A: 880                                                                                                                                                                                            | PRO A: 881, ILE A: 879, TYR A: 896, GLY A: 894, ILE A: 895, TYR A: 889, HIS A: 862, GLY A: 876, SER A: 864, LEU A: 877, ILE A: 872, GLN A: 875, GLY A: 871, ASN A: 868                                                                                     |
| 3             | -11.08 | ASN: 868, ARG: 878                                                                                                                                                                                                | SERA: 864, TYR A: 907, GLY A: 863, HIS A: 862, TYR A: 896, TYR A: 889, GLY A: 894, ALA A: 880, LEU A: 877, ILE A: 895, GLY A: 876, ILE A: 872, ARG A: 865, HIS A: 909                                                                                      |
| 4             | -11.66 | ARG A: 878                                                                                                                                                                                                        | PRO A: 881, ILE: A:879, TYR A: 889, ALA A: 880, GLY A: 894, TYR A: 896, GLN A: 875, HIS A: 862, LEU A: 877, GLY A: 871, GLY A: 876, ILE A: 895, ILE A: 872, ASN A: 868                                                                                     |
| 5             | -10.80 | ASN A: 868, ALA A: 880, ARG A: 878                                                                                                                                                                                | HIS A: 909, ARG A: 865, SER A: 864, TYR A: 907, GLY A: 863, HIS A: 862, TYR A: 896, ILE A: 879, TYR A: 889, GLY A: 894, LEU A: 877, ILE A: 895, GLY A: 876, ILE A: 872                                                                                     |
| 6             | -12.60 | -                                                                                                                                                                                                                 | LEU A: 877, ILE A: 872, SER A: 864, HIS A: 862, ASN A: 868, GLY A: 863, GLU A: 988, ALA A: 898, SER A: 904, PHE A: 897, LYS A: 903, TYR A: 907, TYR A: 896, GLY A: 888, TYR A: 889, GLY A: 876, ARG A: 878, ILE A: 895                                     |
